# Supplementary material for: Cytotoxic, Anti-Hemolytic, and Antioxidant Activities of Ruta chalepensis L. (Rutaceae) Extract, Fractions, and Isolated Compounds
Source: MDPI journal article supplement (doi:10.3390/plants12112203), 2023-06-02
Supplement: s1 [file s1]

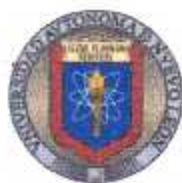

# UANL

UNIVERSIDAD AUTÓNOMA DE NUEVO LEÓN

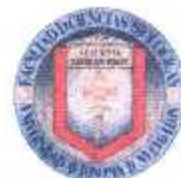

FACULTAD DE CIENCIAS BIOLÓGICAS  
DEPARTAMENTO DE BOTÁNICA  
HERBARIO UNL

## A QUIEN CORRESPONDA:

Por este conducto me permito informar que el Dr. RAMIRO QUINTANILLA LICEA entregó al Herbario UNL dieciséis (16) muestras herbolarias, como parte del Proyecto Académico: Capacidad antitumoral, citotóxica y citoprotectora *in vitro* e *in vivo* de moléculas presentes en plantas de origen mexicano de uso etnofarmacológico tradicional, del cual es Asesor.

La referencia de las muestras entregadas se presenta en la siguiente tabla e incluye el número de registro en la colección de nuestro herbario institucional.

### MATERIAL VEGETAL

| No. de Folio | Género                  | Especie             | Familia        |
|--------------|-------------------------|---------------------|----------------|
| 30642        | <i>Amphipterygium</i>   | <i>adstringens</i>  | Anacardiaceae  |
| 30643        | <i>Artemisia</i>        | <i>ludoviciana</i>  | Asteraceae     |
| 30644        | <i>Cymbopogon</i>       | <i>citratus</i>     | Poaceae        |
| 30645        | <i>Haematoxylum</i>     | <i>brasiletto</i>   | Fabaceae       |
| 30646        | <i>Heterotheca</i>      | <i>inuloides</i>    | Asteraceae     |
| 30647        | <i>Hippocratea</i>      | <i>excelsa</i>      | Celastraceae   |
| 30648        | <i>Jatropha</i>         | <i>dioica</i>       | Euphorbiaceae  |
| 30649        | <i>Justicia</i>         | <i>spicigera</i>    | Acanthaceae    |
| 30650        | <i>Larrea</i>           | <i>tridentata</i>   | Zygophyllaceae |
| 30651        | <i>Minusa</i>           | <i>tenuiflora</i>   | Fabaceae       |
| 30652        | <i>Psacalium</i>        | <i>peltatum</i>     | Asteraceae     |
| 30653        | <i>Pseudognaphalium</i> | <i>obtusifolium</i> | Asteraceae     |
| 30654        | <i>Ruta</i>             | <i>chalepensis</i>  | Rutaceae       |
| 30655        | <i>Smilax</i>           | <i>aspera</i>       | Smilacaceae    |
| 30656        | <i>Tagetes</i>          | <i>lucida</i>       | Asteraceae     |
| 30657        | <i>Turnera</i>          | <i>diffusa</i>      | Turneraceae    |

Sin más por el momento, se extiende la presente para los fines que al interesado convengan.

ATENTAMENTE

Cd. Universitaria, a 7 de Noviembre de 2021

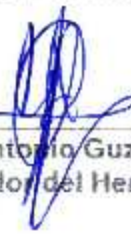  
Dr. Marco Antonio Guzmán Lucio  
Jefe y Curador del Herbario UNL

c.c.p. archivo, Herbario UNL

Pedro de Alba y Manuel Barragán s/n  
Cd. Universitaria, San Nicolás de los Garza, N. L.  
Apartado Postal F-2 y F-38, C.P. 66451  
Tels y Fax: 8329-4110 ext. 8456, 8298-2128 y 8114-3465
