# Supplementary material for: Cytotoxic, Anti-Hemolytic, and Antioxidant Activities of Ruta chalepensis L. (Rutaceae) Extract, Fractions, and Isolated Compounds
Source: MDPI journal article supplement (doi:10.3390/plants12112203), 2023-06-02
Supplement: s1 [file s1]

# INFORMED CONSENT FORM

This is an informed consent form related to a scientific research dealing with testing plant and endophyte extracts against tumor growth *in vitro*, using as a control of cytotoxicity human peripheral blood mononuclear cells from healthy adults. The sample volume will be 20 mL to 30 mL for each experiment (three experiments will be performed).

I, \_\_\_\_\_, confirm that (please check box as appropriate):

|     |                                                                                                                                                                                                                                                                                                                              |                          |
|-----|------------------------------------------------------------------------------------------------------------------------------------------------------------------------------------------------------------------------------------------------------------------------------------------------------------------------------|--------------------------|
| 1.  | I have read and understood the information about the project, as provided in the Information Sheet dated _____.                                                                                                                                                                                                              | <input type="checkbox"/> |
| 2.  | I have been given the opportunity to ask questions about the project and my participation.                                                                                                                                                                                                                                   | <input type="checkbox"/> |
| 3.  | I voluntarily agree to participate in the research.                                                                                                                                                                                                                                                                          | <input type="checkbox"/> |
| 4.  | I understand I can withdraw at any time without giving reasons and that I will not be penalised for withdrawing nor will I be questioned on why I have withdrawn.                                                                                                                                                            | <input type="checkbox"/> |
| 5.  | The procedures regarding confidentiality have been clearly explained (e.g. use of names, pseudonyms, anonymization of data, etc.) to me.                                                                                                                                                                                     | <input type="checkbox"/> |
| 6.  | If applicable, separate terms of consent for interviews, audio, video or other forms of data collection have been explained and provided to me.                                                                                                                                                                              | <input type="checkbox"/> |
| 7.  | The use of the data in research, publications, sharing and archiving has been explained to me.                                                                                                                                                                                                                               | <input type="checkbox"/> |
| 8.  | I understand that other researchers will have access to this data only if they agree to preserve the confidentiality of the data and if they agree to the terms I have specified in this form.                                                                                                                               | <input type="checkbox"/> |
| 9.  | Select only <b>one</b> of the following: <ul style="list-style-type: none"><li>I would like my name used and understand what I have said or written as part of this study will be used in reports, publications and other research outputs so that anything I have contributed to this research can be recognised.</li></ul> | <input type="checkbox"/> |
|     |                                                                                                                                                                                                                                                                                                                              | <input type="checkbox"/> |
| 10. | I, along with the Researcher, agree to sign and date this informed consent form.                                                                                                                                                                                                                                             | <input type="checkbox"/> |

\_\_\_\_\_  
**Participant's Signature**

\_\_\_\_\_  
Print Name

\_\_\_\_\_  
Date

\_\_\_\_\_  
**Researcher's Signature**

\_\_\_\_\_  
Print Name

\_\_\_\_\_  
Date
