# Supplementary material for: Cytotoxic, Anti-Hemolytic, and Antioxidant Activities of Ruta chalepensis L. (Rutaceae) Extract, Fractions, and Isolated Compounds
Source: MDPI journal article supplement (doi:10.3390/plants12112203), 2023-06-02
Supplement: s1 [file s1]

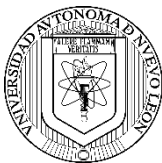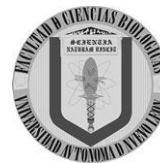

**SUBJECT: Research project evaluation**

**Dr. Ricardo Gómez Flores:**

By this means, you are informed that in a session held on April 26, 2022, the research project with registration number CI-04-26-2022 “Antitumor activity of methanolic extracts of Mexican plants on tumor cell lines” was reviewed and approved.

The global scientific evaluation of this research project complies with technical-scientific quality, scientific relevance and impact, as well as with the criteria, guidelines and institutional requirements.

Sincerely yours,

Atentamente

“*ALERE FLAMMAM VERITATIS*”

Cd. Universitaria a 26 de abril del 2022

COMITÉ DE INVESTIGACIÓN

Dr. Juan Francisco Contreras  
Presidente

Dra. María Julissa Ek Ramos  
Secretario
