# Supplementary material for: Cytotoxic, Anti-Hemolytic, and Antioxidant Activities of Ruta chalepensis L. (Rutaceae) Extract, Fractions, and Isolated Compounds
Source: Plants (Basel). 2023 Jun 2;12(11):2203. doi: 10.3390/plants12112203 (PMC10255231; doi:10.3390/plants12112203)
Supplement: Supplementary file 1 [file plants-12-02203-s001.zip]

Archive with 5 entries (5 files):
- Supplementary Material_Herbarium Identification Voucher.pdf
- Supplementary Material_Informed Consent Form.pdf
- Supplementary Material_Institutional Review Board approval CI-04-26-2022.pdf
- Supplementary Material_Purification Methodology.pdf
- Supplementary Material_Spectroscopic Data.pdf
